# Supplementary material for: Effect of poplar genotypes on mycorrhizal infection and secreted enzyme activities in mycorrhizal and non-mycorrhizal roots
Source: PubMed Central journal article supplement — J Exp Bot. 2010 Sep 29;62(1):249–60. doi: 10.1093/jxb/erq274 (PMC2993916; doi:10.1093/jxb/erq274), 2010-09-29
Supplement: supp_erq274_00049734-file001.pdf [file supp_erq274_00049734-file001.pdf]

**Effect of poplar genotypes on mycorrhizal infection and secreted enzyme activities in mycorrhizal and non mycorrhizal roots**

*Pierre-Emmanuel Courty, Jessy Labbé, Annegret Kohler, Benoît Marçais, Catherine Bastien, Jean-Louis Churin, Jean Garbaye, and François Le Tacon*

**Supplementary Material**

**Table S1:** Heterosis calculated as the ratio between the average of the hybrids and the best parent (a) or between the average of the hybrids and the average of the two parents (b)

| Character                               |                        | Heterosis |       |
|-----------------------------------------|------------------------|-----------|-------|
|                                         |                        | a         | b     |
| Mycorrhizal colonization                |                        | + 25      | + 75  |
| Chlorophyll                             |                        | - 21      | - 7   |
| Leaf maximum area                       |                        | + 46      | + 51  |
| Dry weight                              | Stems                  | - 17      | - 14  |
|                                         | Roots                  | + 1       | + 11  |
|                                         | Leaves                 | -41       | -36   |
| Activities of mycorrhizal root tips     | Xylosidase             | + 26      | + 62  |
|                                         | Glucuronidase          | + 19      | + 44  |
|                                         | N-acetylhexosaminidase | + 22      | + 19  |
|                                         | Cellobiohydrolase      | + 0.2     | + 59  |
|                                         | Glucosidase            | - 13      | + 30  |
|                                         | Acid phosphatase       | + 9       | + 54  |
|                                         | Laccase                | - 15      | - 8   |
| Activities of non mycorrhizal root tips | Xylosidase             | + 34      | + 103 |
|                                         | Glucuronidase          | + 19      | + 82  |
|                                         | N-acetylhexosaminidase | + 3       | + 11  |
|                                         | Cellobiohydrolase      | + 53      | + 75  |
|                                         | Glucosidase            | + 15      | + 38  |
|                                         | Acid phosphatase       | - 4       | - 3   |
|                                         | Laccase                | 0         | 0     |
